# Supplementary material
Source: PubMed Central journal article supplement (PMC3077726)
Supplement: mmc1.pdf [file mmc1.pdf]

B3GNT7  
LOC93349  
DIS3L2  
FBXO36  
SLC16A14  
C2orf52  
C2orf57  
TIGD1  
UNQ830  
HCG3

| 10q26.3    | 11p13      | 12q24.33   | 13q14.2    | 15q11.2    | 16p11.2    | 17p13.2    | 17q21.31   | 18q21.1    |
|------------|------------|------------|------------|------------|------------|------------|------------|------------|
| chr10:1316 | chr11:3262 | chr12:1264 | chr13:4581 | chr15:1885 | chr16:2930 | chr17:5499 | chr17:4144 | chr18:4263 |
| BNIP3      | CSTF3      | STX2       | ATP7B      | CYFIP1     | ALDOA      | ACADVL     | MAPT       | PIAS2      |
| INPP5A     | HIPK3      | MMP17      | RCBTB2     | TUBGCP5    | MAZ        | ALOX12     | LRR37A     | IER3IP1    |
| GLRX3      | TCP11L1    | RAN        | ESD        | OR4N4      | PPP4C      | ASGR1      | ARL17P1    | TCEB3B     |
| DPYSL4     | PRRG4      | SFRS8      | MLNR       | LOC28375   | MAPK3      | ASGR2      | KIAA1267   | KATNAL2    |
| C10orf92   | QSER1      | ULK1       | HTR2A      | LOC28376   | SPN        | ATP1B2     | LRR37A2    | HDHD2      |
| PPP2R2D    | DEPDC7     | PIWIL1     | KPNA3      | A26B1      | SULT1A3    | CD68       | ARL17      | TCEB3C     |
| LRR327     | CCDC73     | FZD10      | NEK3       | OR4M2      | TBX6       | CHRNA1     |            | TCEB3CL    |
| NKX6-2     |            | RIMBP2     | PCDH8      | LOC650137  | DOC2A      | CLDN7      |            |            |
| C10orf91   |            | GALNT9     | RB1        |            | HIRIP3     | DLG4       |            |            |
| PWWP2B     |            | EP400      | SUCLA2     |            | TAOK2      | DVL2       |            |            |
| EBF3       |            | NOC4L      | ITM2B      |            | MVP        | EFNB3      |            |            |
| TCERG1L    |            | PUS1       | UTP14C     |            | CDIPT      | EIF4A1     |            |            |
| JAKMIP3    |            | TMEM132L   | P2RY5      |            | QPRT       | EIF5A      |            |            |
| STK32C     |            | SLC15A4    | TRIM13     |            | SEZ6L2     | FGF11      |            |            |
|            |            | GLT1D1     | SUGT1      |            | GIYD2      | GPS2       |            |            |
|            |            | GPR133     | LECT1      |            | GDPD3      | POLR2A     |            |            |
|            |            | DDX51      | FNDC3A     |            | C16orf53   | SHBG       |            |            |
|            |            |            | LRCH1      |            | YPEL3      | SLC2A4     |            |            |
|            |            |            | INTS6      |            | FAM57B     | SOX15      |            |            |
|            |            |            | CKAP2      |            | PRRT2      | TP53       |            |            |
|            |            |            | MED4       |            | LOC124441  | TNK1       |            |            |
|            |            |            | VPS36      |            | FLJ25404   | TNFSF13    |            |            |
|            |            |            | PHF11      |            | KCTD13     | TNFSF12    |            |            |
|            |            |            | RCBTB1     |            | ASPHD1     | FXR2       |            |            |
|            |            |            | NUDT15     |            | C16orf54   | MPDU1      |            |            |
|            |            |            | THSD1      |            | CCDC95     | CENTB1     |            |            |
|            |            |            | CYSLTR2    |            | SULT1A4    | KIAA0753   |            |            |
|            |            |            | C13orf1    |            | GIYD1      | CLEC10A    |            |            |
|            |            |            | RNASEH2B   |            | BOLA2      | GABARAP    |            |            |
|            |            |            | DHRS12     |            | BOLA2B     | JMJD3      |            |            |
|            |            |            | C13orf18   |            |            | WSCD1      |            |            |
|            |            |            | CDADC1     |            |            | DULLARD    |            |            |
|            |            |            | CAB39L     |            |            | C17orf81   |            |            |
|            |            |            | CCDC70     |            |            | AIPL1      |            |            |
|            |            |            | SETDB2     |            |            | SENP3      |            |            |
|            |            |            | EBPL       |            |            | MED31      |            |            |
|            |            |            | ARL11      |            |            | YBX2       |            |            |
|            |            |            | WDFY2      |            |            | FAM64A     |            |            |
|            |            |            | LOC144983  |            |            | XAF1       |            |            |
|            |            |            | DLEU7      |            |            | WDR79      |            |            |
|            |            |            | FAM124A    |            |            | PLSCR3     |            |            |
|            |            |            | KCNRG      |            |            | NLGN2      |            |            |
|            |            |            | NEK5       |            |            | ZBTB4      |            |            |
|            |            |            | ALG11      |            |            | PHF23      |            |            |
|            |            |            | LOC647174  |            |            | PITPNM3    |            |            |
|            |            |            |            |            |            | TEKT1      |            |            |
|            |            |            |            |            |            | LSMD1      |            |            |
|            |            |            |            |            |            | KIAA1787   |            |            |

TXNDC17  
TMEM88  
SAT2  
C17orf49  
DNAH2  
KCTD11  
SLC16A11  
FBXO39  
SLC16A13  
C17orf74  
C17orf61  
BCL6B  
SLC13A5  
TMEM102  
TMEM95  
SPEM1  
LOC388327  
TNFSF12-TNFSF13  
RNASEK  
AMAC1L3

|            |            |                         |
|------------|------------|-------------------------|
| 19q13.42   | 20p13      | 22q12.3                 |
| chr19:5920 | chr20:2352 | chr22:34972212-38532407 |
| FCAR       | AVP        | ATF4                    |
| KIR2DL1    | GNRH2      | CSF2RB                  |
| KIR2DL3    | IDH3B      | CSNK1E                  |
| KIR2DL4    | ITPA       | H1Fo                    |
| KIR2DS4    | OXT        | IL2RB                   |
| KIR3DL1    | PTPRA      | KCNJ4                   |
| KIR3DL2    | SNRPB      | LGALS1                  |
| LAIR1      | ATRN       | LGALS2                  |
| LAIR2      | ProSAPIP1  | MFNG                    |
| NDUFA3     | NOL5A      | MGAT3                   |
| CNOT3      | UBOX5      | MPST                    |
| RPS9       | C20orf194  | MYH9                    |
| NCR1       | CPXM1      | NCF4                    |
| LILRB2     | EBF4       | PDGFB                   |
| LILRB1     | FASTKD5    | POLR2F                  |
| LILRB5     | VPS16      | PVALB                   |
| LILRB4     | FAM113A    | RAC2                    |
| LILRA1     | MRPS26     | RPL3                    |
| LILRB3     | C20orf116  | SOX10                   |
| LILRA3     | ZNF343     | SSTR3                   |
| LILRA2     | SLC4A11    | TST                     |
| LILRA4     | TMC2       | PLA2G6                  |
| PRPF31     | C20orf141  | GALR3                   |
| TFPT       | TGM6       | APOL1                   |
| TTYH1      |            | EIF3D                   |
| TSEN34     |            | CACNA1I                 |
| MBOAT7     |            | SYNGR1                  |
| LENG1      |            | PICK1                   |
| LILRA6     |            | GTPBP1                  |
| KIR3DX1    |            | APOBEC3B                |
| LENG9      |            | JOSD1                   |
| LENG8      |            | DNAL4                   |
| KIR3DL3    |            | CACNG2                  |
| OSCAR      |            | MAP3K7IP1               |
| TMC4       |            | DDX17                   |
| CDC42EP5   |            | KDELR3                  |
| NLRP7      |            | RABL4                   |
| VSTM1      |            | TRIOBP                  |
| LILRA5     |            | CDC42EP1                |
| KIR3DP1    |            | DMC1                    |
|            |            | GCAT                    |
|            |            | CBX6                    |
|            |            | NPTXR                   |
|            |            | CBX7                    |
|            |            | SLC16A8                 |
|            |            | SH3BP1                  |
|            |            | MAFF                    |
|            |            | CBY1                    |

UNC84B  
TXN2  
TMEM184B  
GGA1  
PSCD4  
APOBEC3C  
CARD10  
EIF3EIP  
SMCR7L  
TOMM22  
PDXP  
APOBEC3G  
NOL12  
KCTD17  
FOXRED2  
BAIAP2L2  
C22orf23  
MICALL1  
RPS19BP1  
ELFN2  
C1QTNF6  
ANKRD54  
APOBEC3D  
ENTHD1  
TMPRSS6  
APOBEC3H  
APOBEC3A  
APOBEC3F  
C22orf33
